# Supplementary material for: Acid Dentin Lysate Modulates Macrophage Polarization and Osteoclastogenesis In Vitro
Source: Materials (Basel). 2021 Nov 16;14(22):6920. doi: 10.3390/ma14226920 (PMC8622705; doi:10.3390/ma14226920)
Supplement: Supplementary file 1 [file materials-14-06920-s001.zip › materials-1405569-supplementary.pdf]

# Acid Dentin Lysate Modulates Macrophage Polarization and Osteoclastogenesis In Vitro

Jila Nasirzade <sup>1</sup>, Zahra Kargarpour <sup>1</sup>, Layla Panahipour <sup>1</sup> and Reinhard Gruber <sup>1,2,3,\*</sup>

<sup>1</sup> Department of Oral Biology, Dental School, Medical University of Vienna, Sensengasse 2a, 1090 Vienna, Austria; jila.nasirzaderajiri@meduniwien.ac.at (J.N.); zahra.kargarpooresfahani@meduniwien.ac.at (Z.K.); layla.panahipour@meduniwien.ac.at (L.P.)

<sup>2</sup> Department of Periodontology, School of Dental Medicine, University of Bern, 3012 Bern, Switzerland

<sup>3</sup> Austrian Cluster for Tissue Regeneration, 1200 Vienna, Austria

\* Correspondence: reinhard.gruber@meduniwien.ac.at; Tel.: +43 (0)699 10718472

**Table S1.** Comparison of anti-inflammatory effect of ADL prepared from HCl 0.1 M and 1.0 M. ADL prepared from HCl 1.0 M shows a stronger anti-inflammatory effect through suppression of the respective gene expression in bone marrow derived stem cells.

| Gene | LPS + ADL 1.0 M/LPS | LPS + ADL 0.1 M/LPS |
|------|---------------------|---------------------|
| IL1  | 0.007               | 0.201               |
| IL6  | 0.079               | 0.415               |
| COX2 | 0.2                 | 0.3                 |

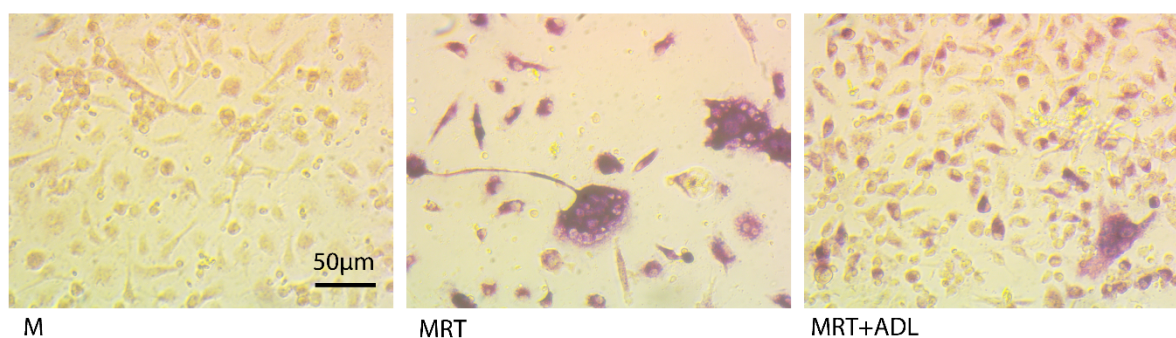

**Figure S1.** ADL suppresses osteoclastogenesis. Number of multinucleated cells stained positive for TRAP was decreased by ADL. M and MRT stand for MCSF and MCSF + RANKL + TGF- $\beta$ , respectively.

### *ADL supports the M2 phenotype of macrophages*

The M2 alternative form of the macrophages characteristically express arginase 1 and CD206+ as a cell surface marker. To evaluate whether ADL modulates M2 polarization of the macrophages, expression of CD206+ in murine bone marrow-derived macrophages and arginase-1 in murine bone marrow-derived macrophages and RAW 264.7 cells was determined by RT-PCR analysis. Results revealed an ADL-induced expression of arginase 1 and although not significant results in an increase of CD206+, suggesting that ADL pushes macrophages towards the M2 phenotype (Supplementary Figure S2).

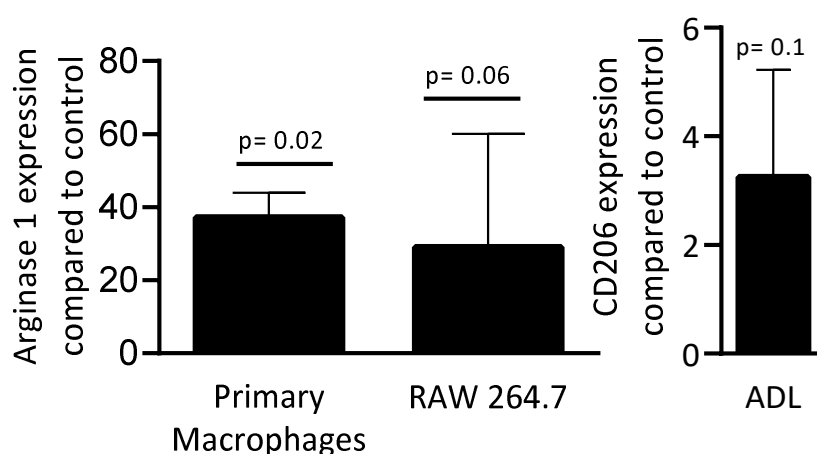

**Figure S2.** ADL increases arginase 1 expression in murine bone marrow-derived macrophages and RAW 264.7 cells. Bone marrow-derived macrophages and RAW 264.7 cells were exposed to ADL for overnight. Statistical analysis was based on Kruskal-Wallis test, and the P values indicate a comparison of each group to untreated control.
